# Supplementary material for: Tissue biomarkers of breast cancer and their association with conventional pathologic features
Source: PubMed Central journal article supplement — Br J Cancer. 2013 Jan 8;108(2):351–60. doi: 10.1038/bjc.2012.552 (PMC3566809; doi:10.1038/bjc.2012.552), 2013-01-08
Supplement: bjc2012552x2.pdf [file bjc2012552x2.pdf]

## Supplementary Figure S2

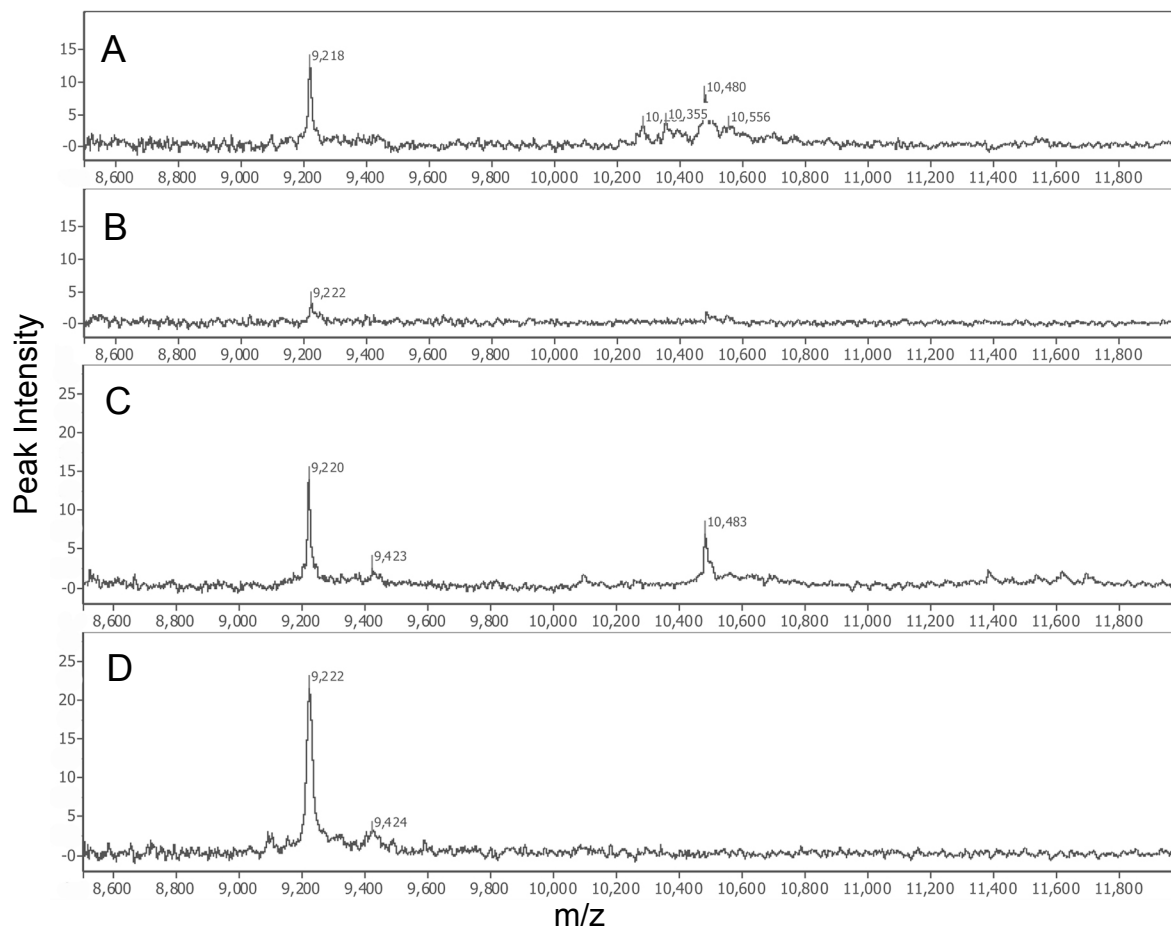

Figure S2. SELDI-TOF MS profiles on normal-phase (NP20) chips, showing protein peaks immunoprecipitated from MCF-7 breast cancer cell lysates using three different S100P antibodies. A: Rabbit monoclonal (Epitomics); B: Mouse polyclonal (Abnova); C: Rabbit polyclonal (Invitrogen). D: Immunoprecipitate from rabbit polyclonal antibody (Invitrogen) after further purification by reverse-phase HPLC.

### Methods

**Immunoprecipitation.** MCF-7 cells were lysed in buffer containing 20 mM Tris-HCl pH 7.5, 150 mM NaCl, 1 mM EDTA, 1 mM EGTA, 1% Triton X-100. To isolate S100P, 25  $\mu$ l (0.75 mg) of Protein G Dynabeads (Invitrogen) were incubated with S100P antibody (rabbit monoclonal #5263-1, 5.45  $\mu$ g, Epitomics; MaxPab mouse polyclonal #H0006286-B01P, 5  $\mu$ g, Abnova; or rabbit polyclonal #18-0046, 4.68  $\mu$ g, Invitrogen) for 30 min at room temperature with rotation. Following two washes with PBS pH 7.4 containing 0.02% Tween 20, the bound antibody-bead complex was added to 50  $\mu$ l of cell lysate, mixed by vortexing, and incubated for 2 h at room temperature with rotation. The beads were washed three times with PBS pH 7.4 and bound proteins eluted with 100 mM glycine, pH 2.8. Fractions were monitored by SELDI-TOF MS on normal-phase NP20 protein chips (Bio-Rad).

**Reverse-phase HPLC.** Immunoprecipitated proteins were applied to a 4.6 x 250 mm C18 column (Jupiter, 5  $\mu$ m, 300  $\text{\AA}$ ) and eluted at 1.5 ml/min with a 30-min gradient from 15% to 60% acetonitrile in 0.1% trifluoroacetic acid.
