# Supplementary material for: Tissue biomarkers of breast cancer and their association with conventional pathologic features
Source: PubMed Central journal article supplement — Br J Cancer. 2013 Jan 8;108(2):351–60. doi: 10.1038/bjc.2012.552 (PMC3566809; doi:10.1038/bjc.2012.552), 2013-01-08
Supplement: bjc2012552x3.pdf [file bjc2012552x3.pdf]

**Supplementary Table S1. Association of two protein markers and their combination with tumor histopathologic variables.**

| Tumor variables                      | Lymph Node Negative (n=84) |                |            | Lymph Node Positive (n=85) |           |                |            |               |
|--------------------------------------|----------------------------|----------------|------------|----------------------------|-----------|----------------|------------|---------------|
|                                      | n                          | P<br>Ubiquitin | P<br>S100P | P<br>Combined              | n         | P<br>Ubiquitin | P<br>S100P | P<br>Combined |
| <b>Size</b><br>≤2 cm vs. >2cm        | 43 vs. 41                  | 0.059          | 0.013      | 0.025                      | 13 vs. 68 | 0.057          | 0.066      | 0.015         |
| <b>Grade</b><br>G1 vs. G3            | 10 vs. 45                  | 0.775          | 0.665      | 0.692                      | 8 vs. 47  | 0.875          | 0.984      | 0.338         |
| <b>LVI</b><br>Present vs. Absent     | 15 vs. 69                  | 0.312          | 0.249      | 0.404                      | 68 vs. 17 | 0.005          | 0.001      | 0.002         |
| <b>ER</b><br>Positive vs. Negative   | 62 vs. 21                  | 0.757          | 0.173      | 0.383                      | 58 vs. 23 | 0.011          | 0.026      | 0.004         |
| <b>PR</b><br>Positive vs. Negative   | 54 vs. 28                  | 0.284          | 0.053      | 0.112                      | 44 vs. 23 | 0.001          | <0.001     | <0.001        |
| <b>HER2</b><br>Positive vs. Negative | 10 vs. 34                  | 0.248          | 0.054      | 0.139                      | 22 vs. 46 | 0.064          | 0.056      | 0.041         |
